# Supplementary material for: Design and investigation of interactions of novel peptide conjugates of purine and pyrimidine derivatives with EGFR and its mutant T790M/L858R: an in silico and laboratory study
Source: Springer Nature journal article supplement (doi:10.1007/s11030-023-10772-x), 2024-01-19
Supplement: 11030_2023_10772_MOESM1_ESM.pdf [file 11030_2023_10772_MOESM1_ESM.pdf]

## Supplementary Information

### Design and Investigation of Binding Interactions of Novel Peptide Conjugates of Purine and Pyrimidine Derivatives with EGFR and its Mutant T790M/L858R– An *in silico* and Laboratory Study

Hannah L. Hunt, Beatriz G. Goncalves, Mary A. Biggs, Mia I. Rico, Molly E. Murray, Charlotta G. Lebedenko, and Ipsita A. Banerjee\*

Department of Chemistry, Fordham University 441 East Fordham Road, Bronx, New York 10458, USA

\* Corresponding Author:

Email: [banerjee@fordham.edu](mailto:banerjee@fordham.edu)

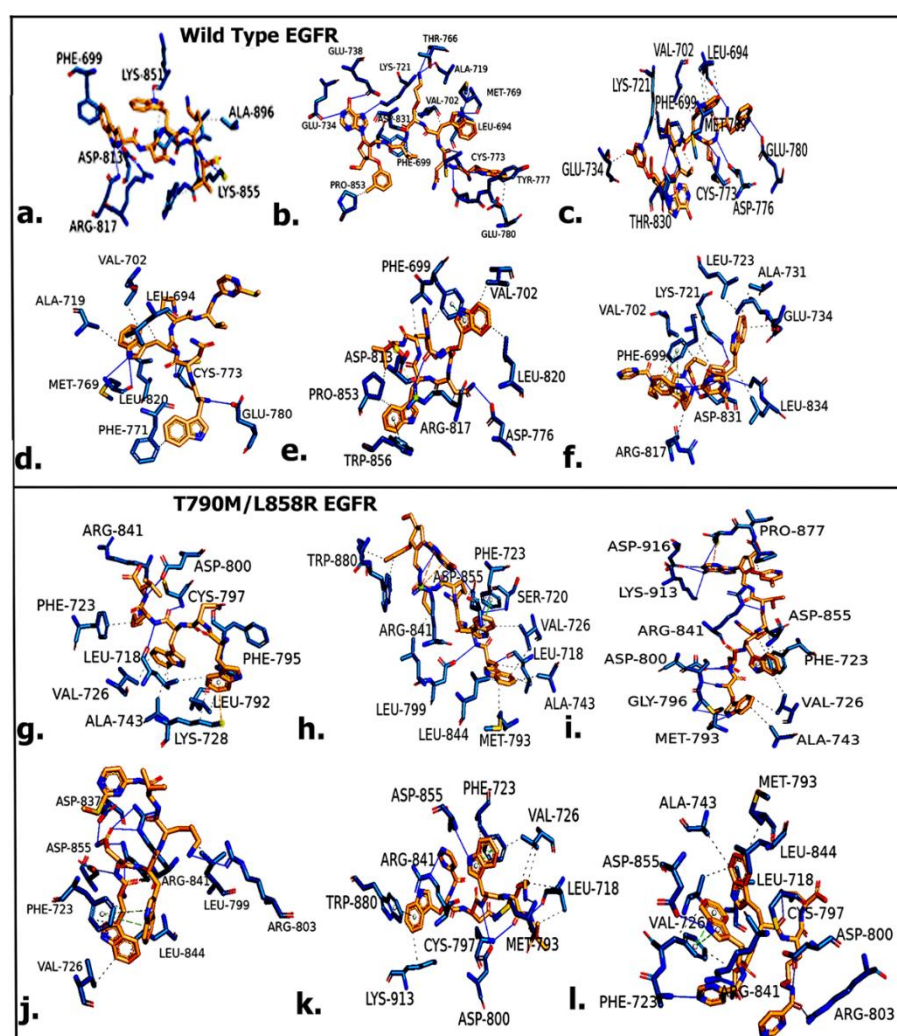

**Figure S1.** Comparison of protein-ligand interactions obtained using PLIP. Top: Wild Type EGFR (a) WNWKV; (b) WNWKV-CPU; (c) WNWKV-NPU; (d) WNWKV-MPY; (e) WNWKV-PYC; (f) WNWKV-(PYC)<sub>2</sub>. Bottom: Double Mutant T790M/L858R. (g) WNWKV; (h) WNWKV-CPU; (i) WNWKV-NPU; (j) WNWKV-MPY; (k) WNWKV-PYC; (l) WNWKV-(PYC)<sub>2</sub>. Yellow indicates ligands while blue segments are indicative of the receptor.

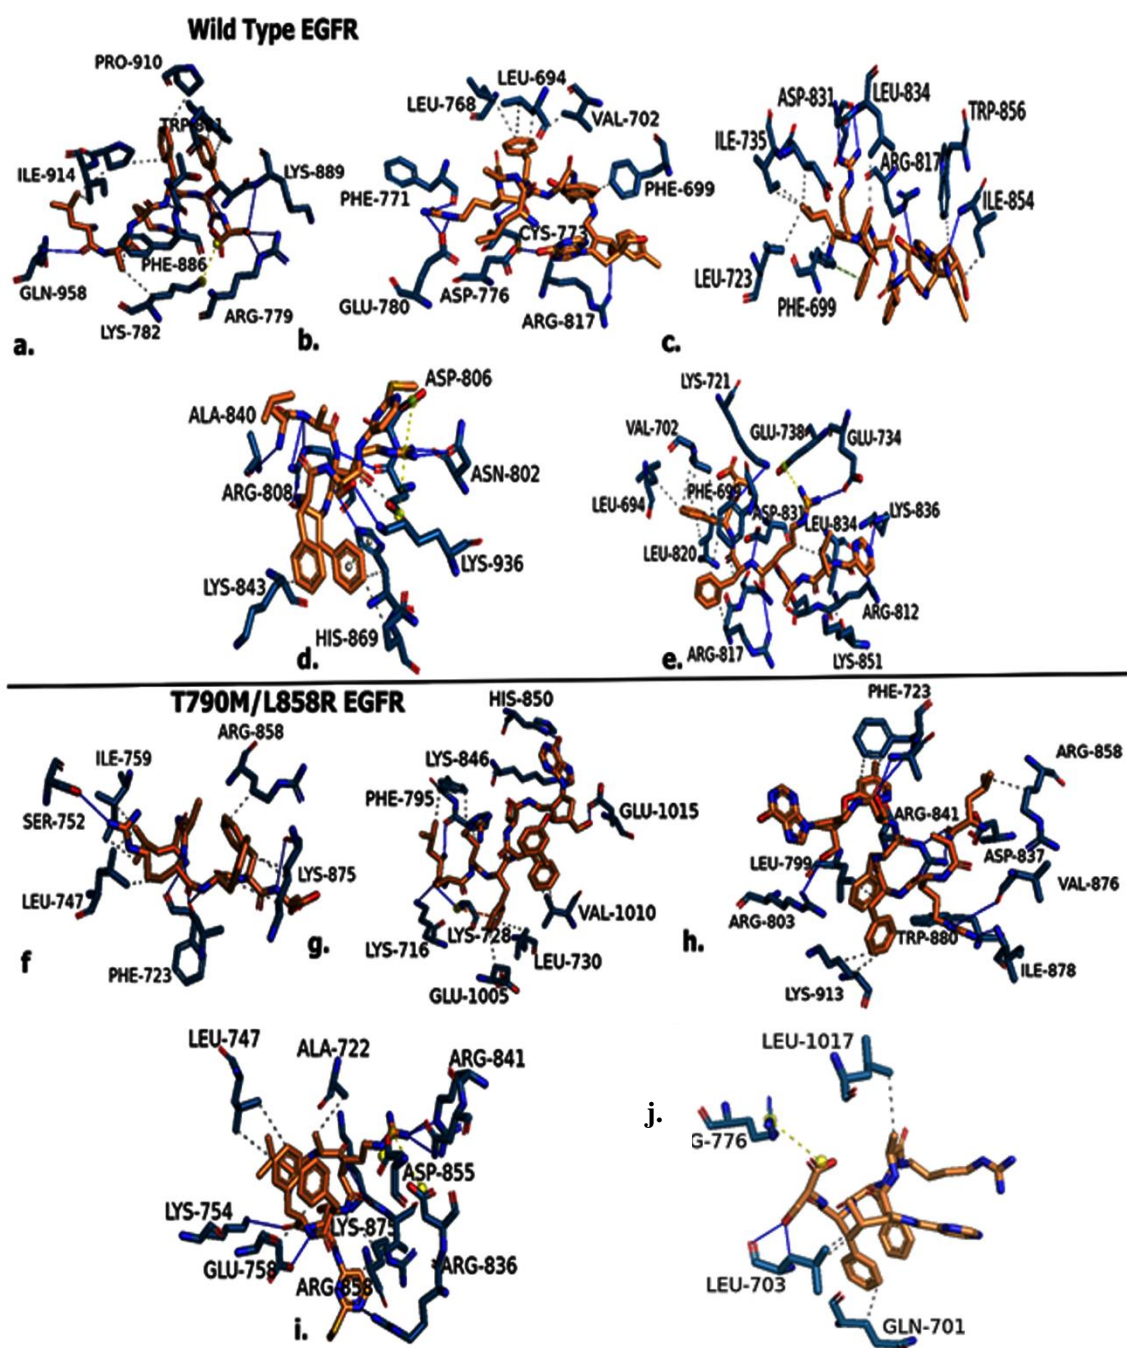

**Figure S2.** Comparison of protein-ligand interactions obtained using PLIP. Top: Wild Type EGFR (a) LARFFS; (b) LARFFS-CPU; (c) LARFFS-NPU; (d) LARFFS-MPY; (e) LARFFS-PYC; Bottom: Double Mutant T790M/L858R. (f) LARFFS; (g) LARFFS-CPU; (h) LARFFS-NPU; (i) LARFFS-MPY; (j) LARFFS-PYC.



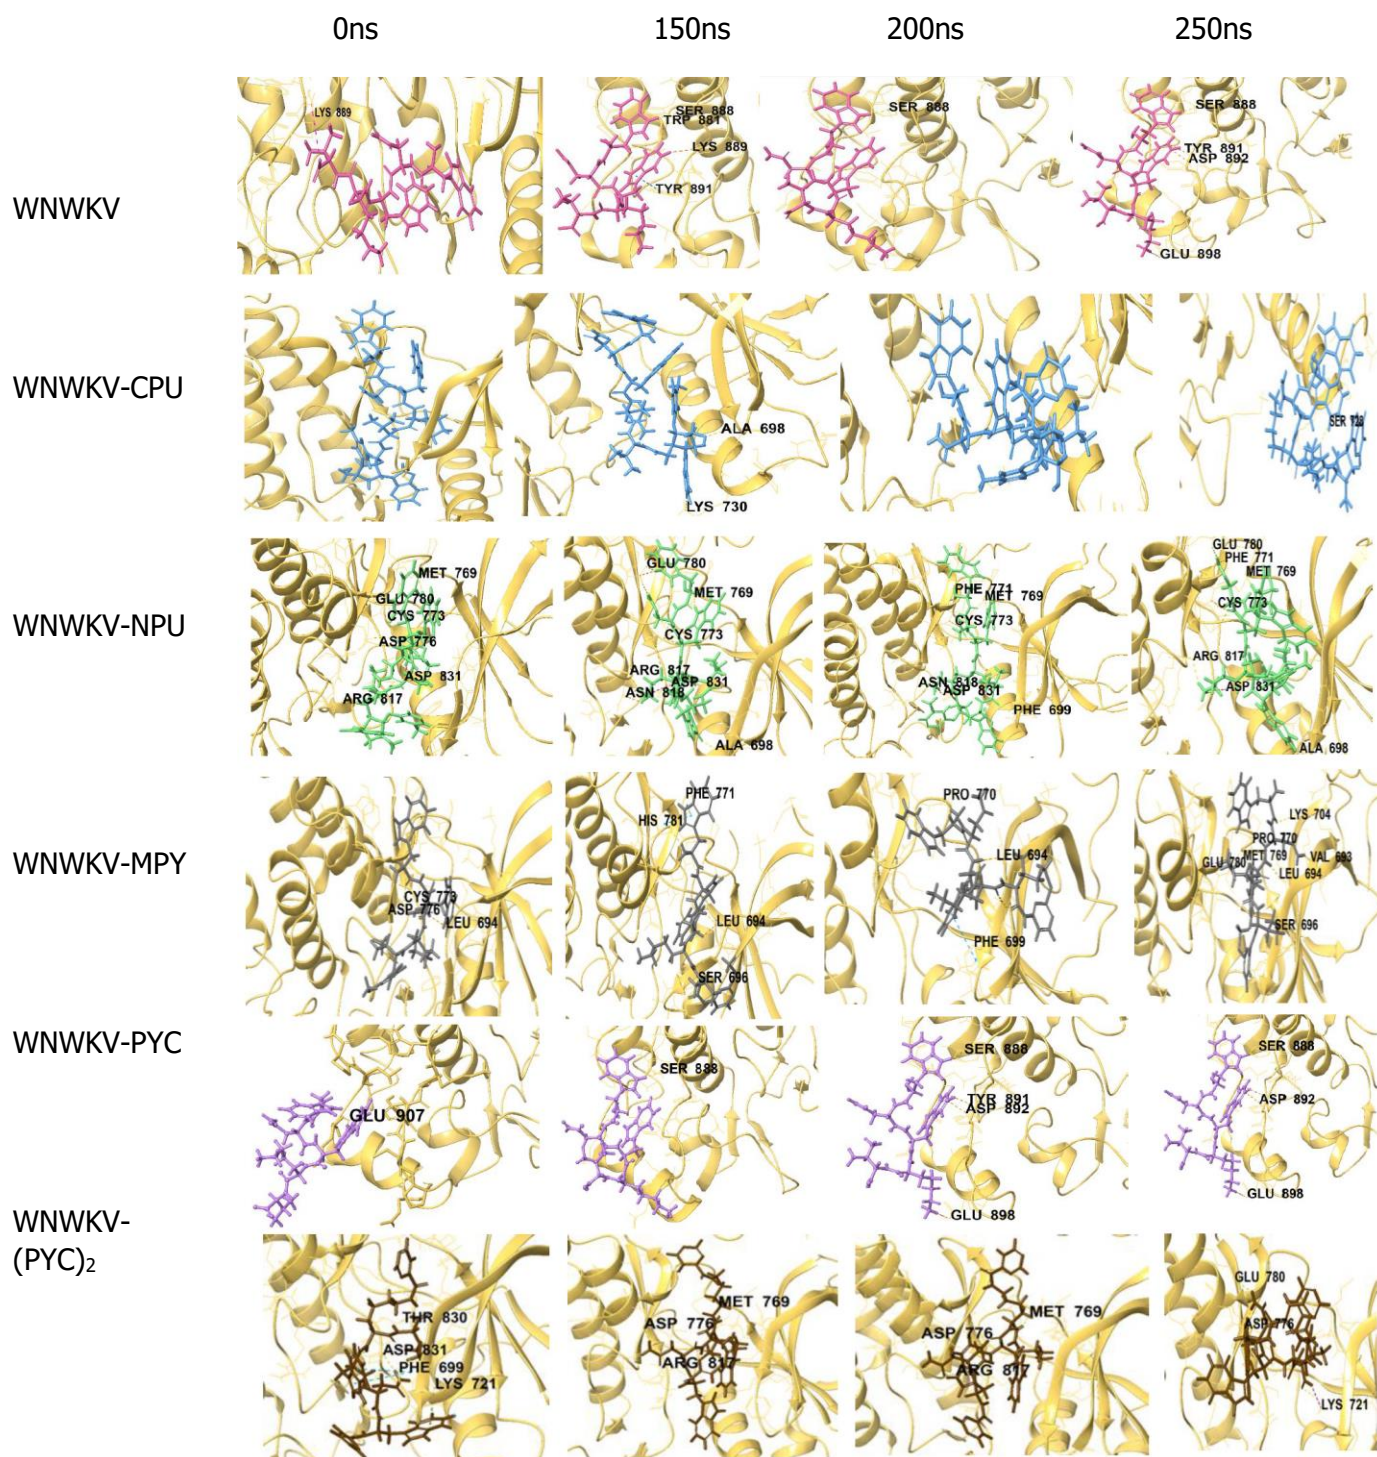

**Figure S4.** Trajectory images over 250 ns simulation of WNWKV and its conjugates with the kinase domain of the wild type EGFR receptor.

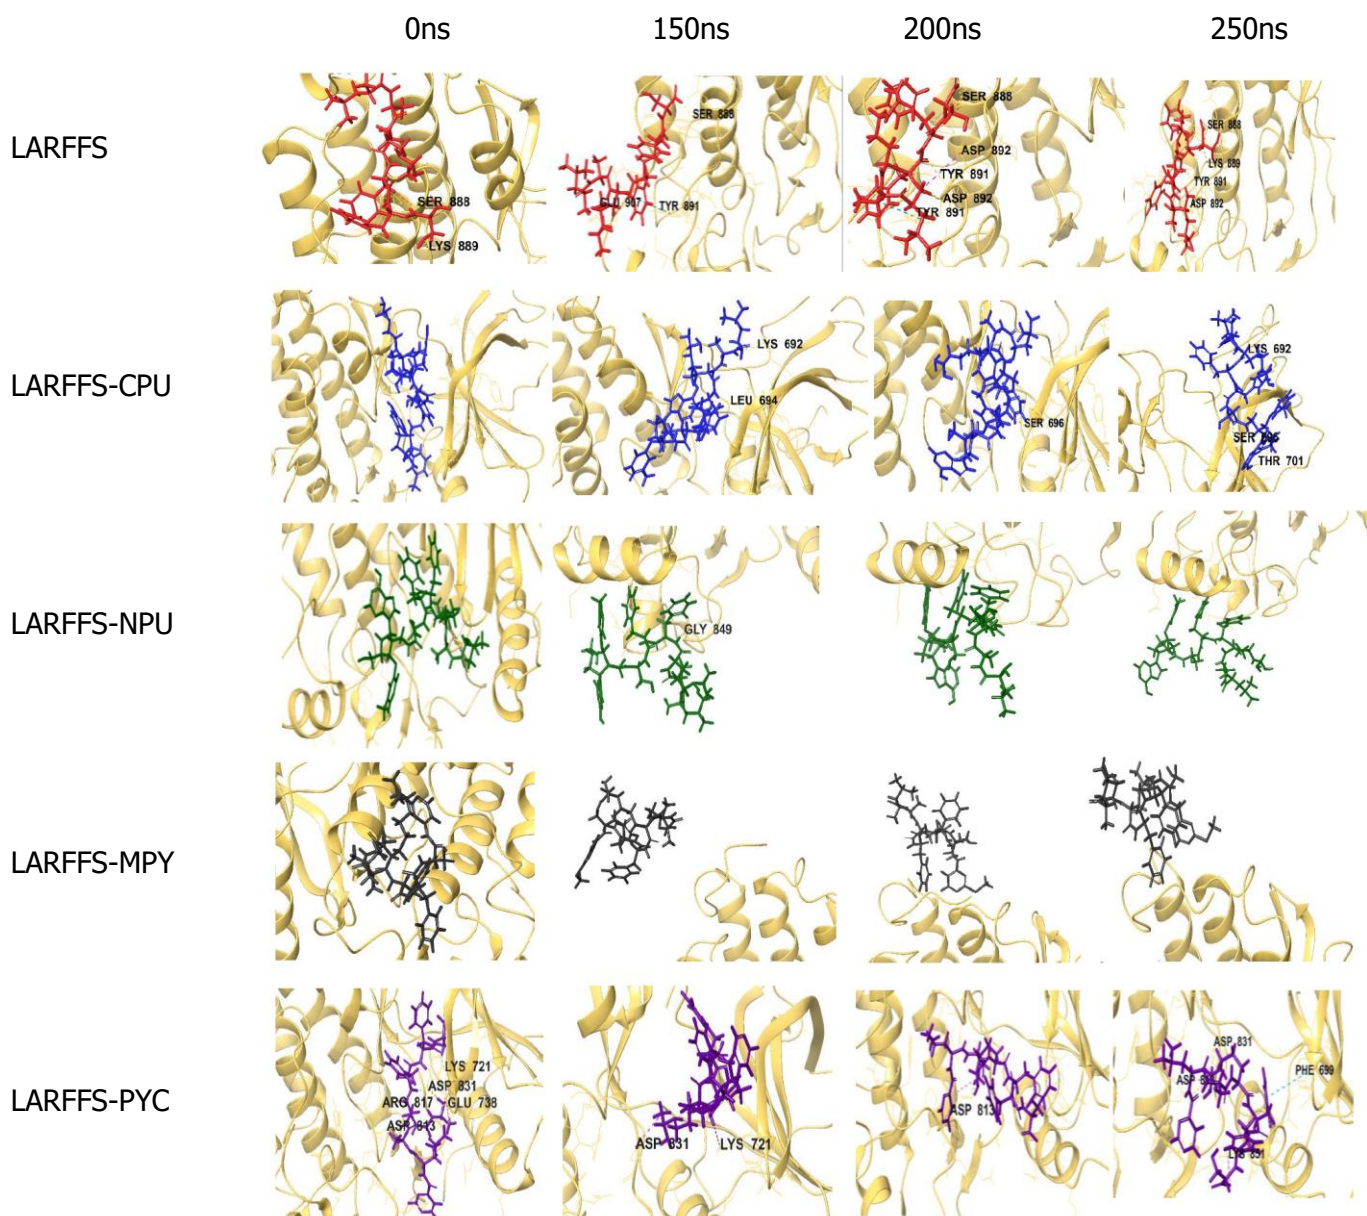

**Figure S5.** Trajectory images over 250 ns simulation of LARFFS and its conjugates with the kinase domain of the wild type EGFR receptor.

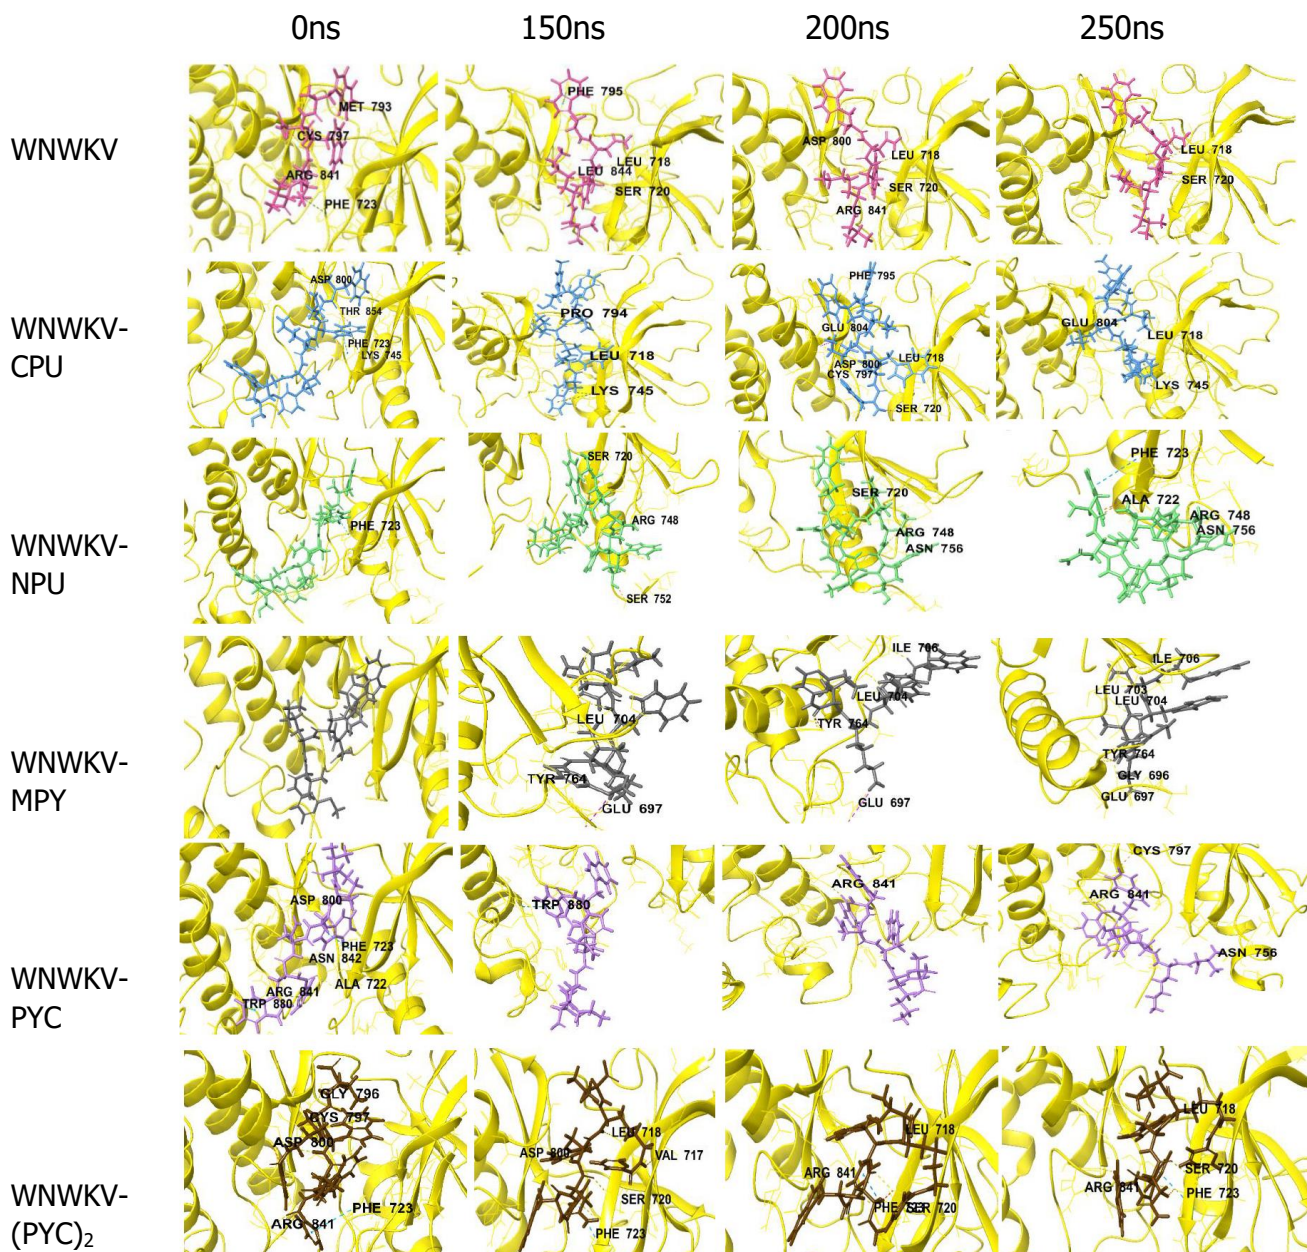

**Figure S6.** Trajectory images over 250 ns simulation of WNWKV and its designed conjugates with the kinase domain of the T790M/L858R double mutant EGF receptor.

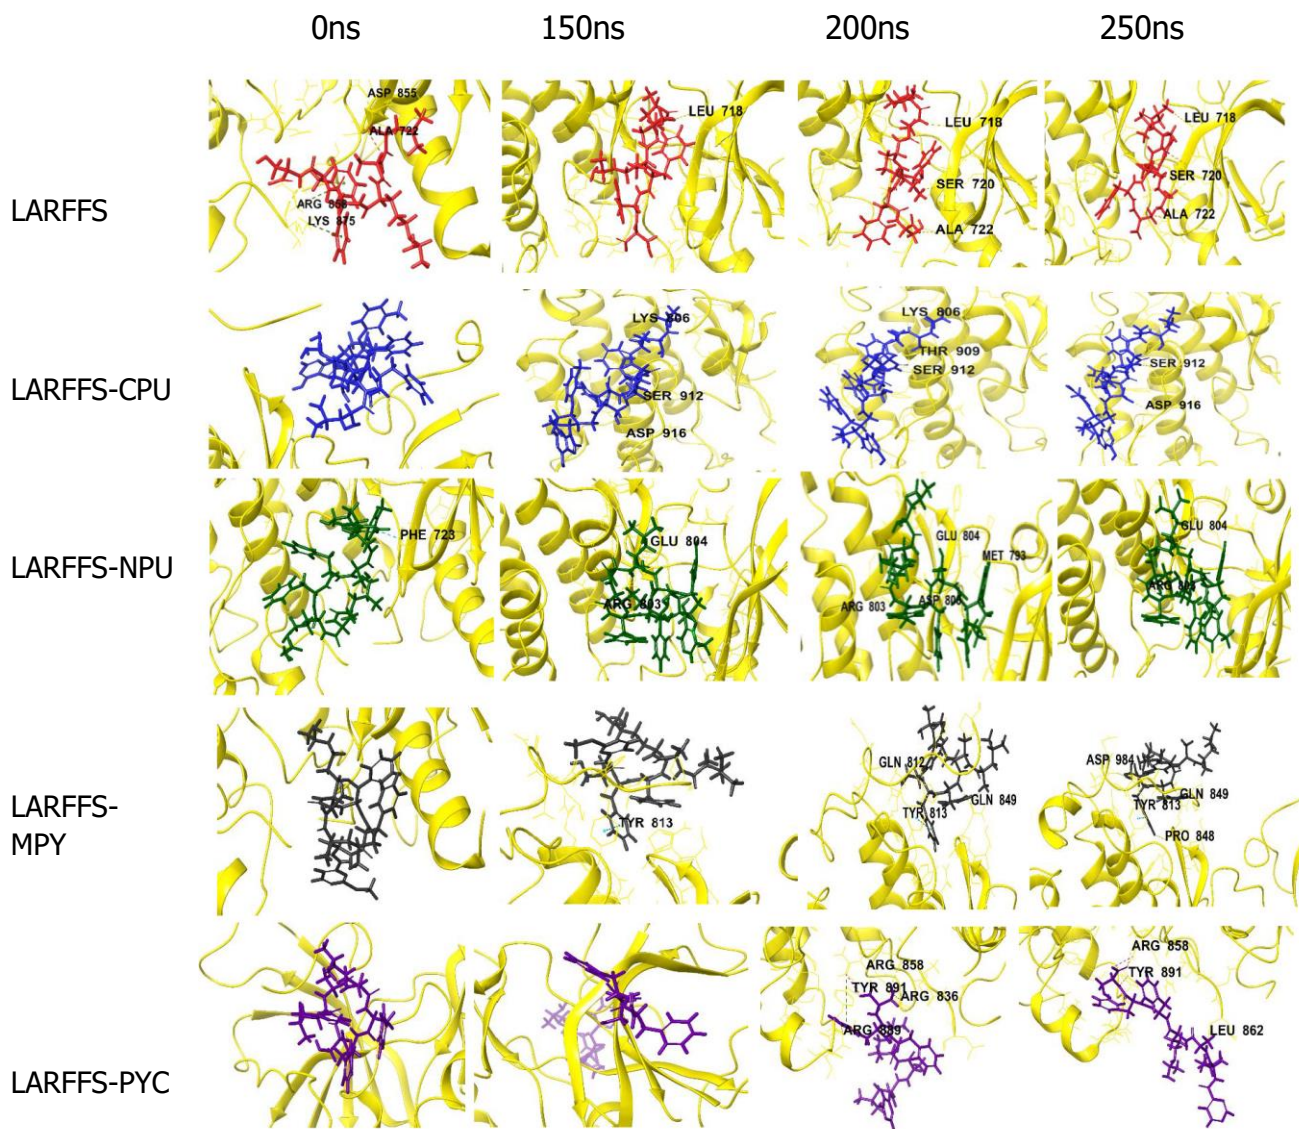

**Figure S7.** Trajectory images over 250 ns simulation of LARFFS and its designed conjugates with the kinase domain of the T790M/L858R double mutant EGF receptor.

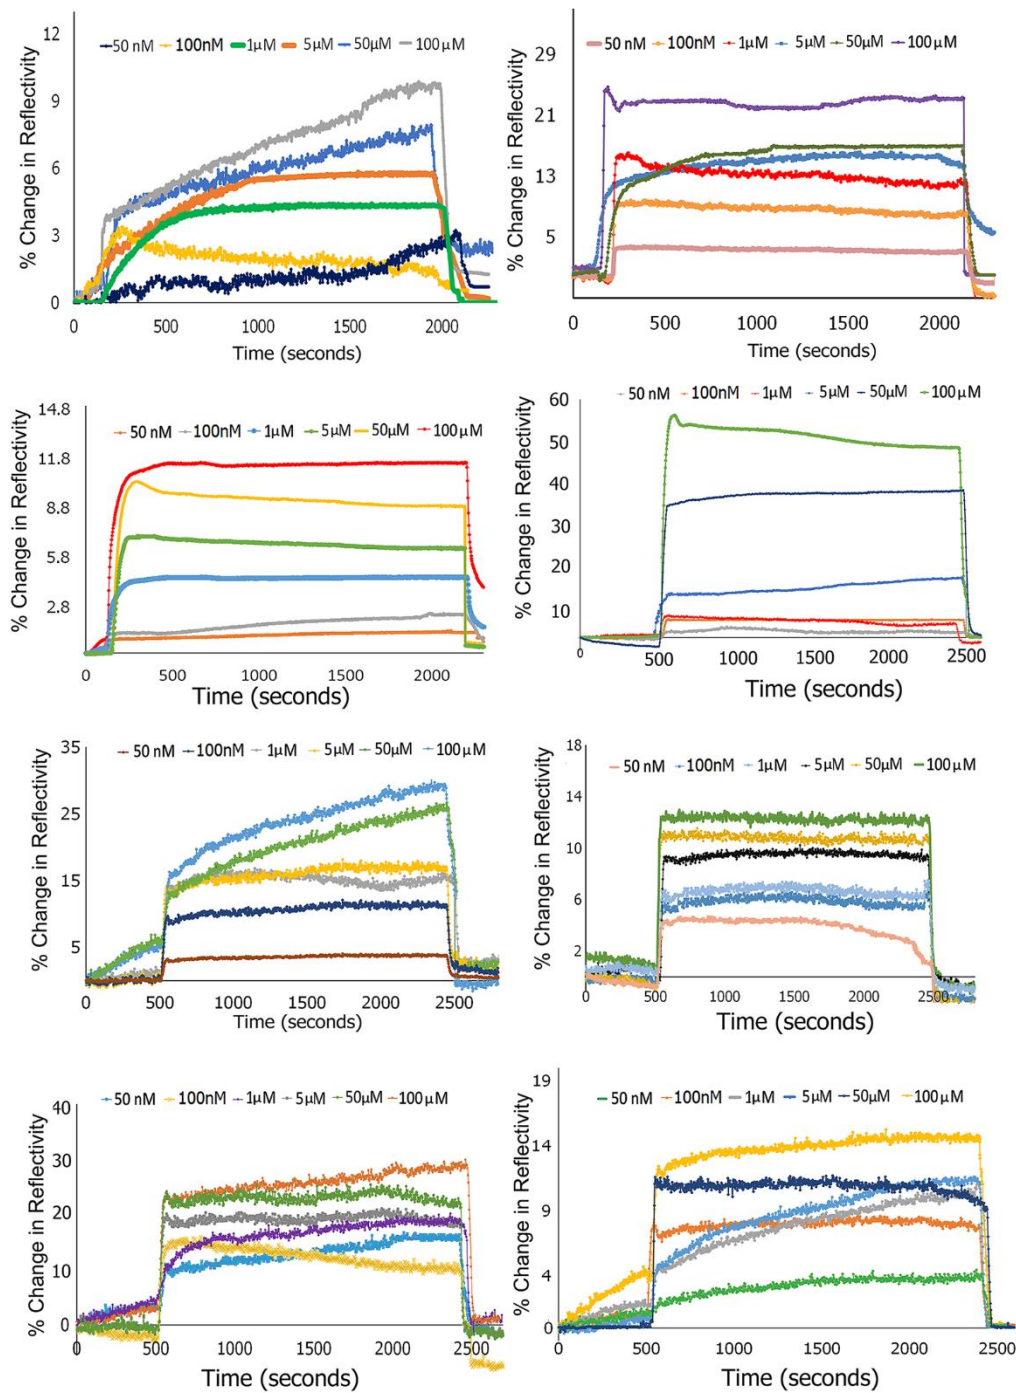

**Figure S8.** SPR sensograms obtained for binding with Wild Type EGFR (left hand side) and T790M/L858R EGFR (right hand side). Top through bottom: WNWKV; WNWKV-(PYC)<sub>2</sub>; LARFFS and LARFFS-PYC.



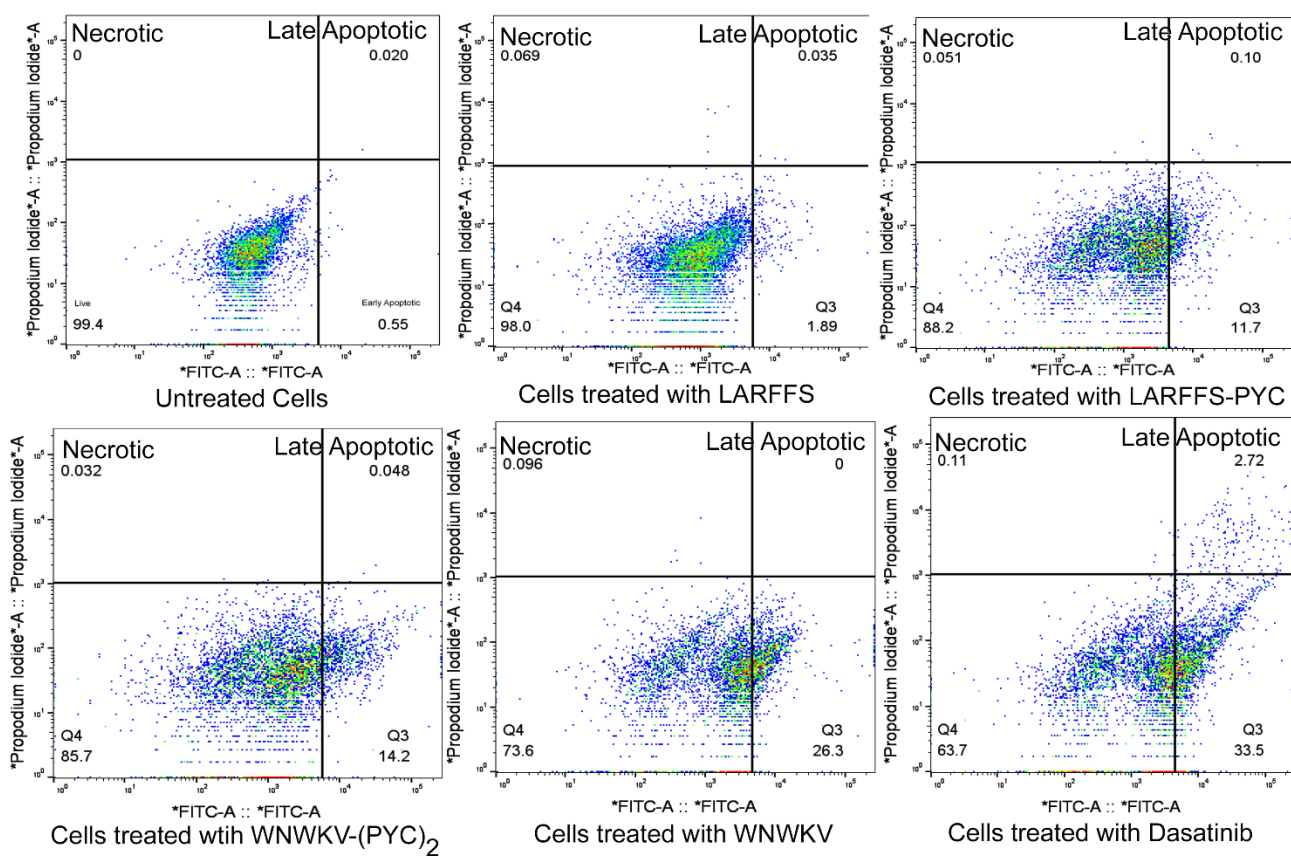

**Figure S9.** Annexin V/propidium iodide apoptosis studies using flow cytometry results showing effects of various constructs on primary lung fibroblasts after treatment over a 24 hour incubation period. The concentration of each of the constructs  $5 \mu M$ .
